# Supplementary material for: Adverse events and overall health and well-being after COVID-19 vaccination: interim results from the VAC4COVID cohort safety study
Source: HighWire-hosted journal article supplement (doi:10.1136/bmjopen-2021-060583), 2022-06-01
Supplement: bmjopen-2021-060583supp002_data_supplement.pdf [file bmjopen-2021-060583supp002_data_supplement.pdf]

## Supplemental File 2 – MedDRA® Code Lists

| Symptom group | Code                     | Description                         |                          |
|---------------|--------------------------|-------------------------------------|--------------------------|
| Headache      | 10004087                 | Band-like headache                  |                          |
|               | 10009236                 | Classical migraine                  |                          |
|               | 10010108                 | Common migraine                     |                          |
|               | 10016998                 | Forehead headache                   |                          |
|               | 10019136                 | Hangover effect                     |                          |
|               | 10019200                 | Head pressure                       |                          |
|               | 10019211                 | Headache                            |                          |
|               | 10019215                 | Headache dull                       |                          |
|               | 10019216                 | Headache fullness                   |                          |
|               | 10019220                 | Headache occurring                  |                          |
|               | 10019224                 | Headache sinus                      |                          |
|               | 10019225                 | Headache temporal                   |                          |
|               | 10019226                 | Headache tension                    |                          |
|               | 10019232                 | Headaches cluster                   |                          |
|               | 10019476                 | Hemiplegic migraine                 |                          |
|               | 10027599                 | Migraine                            |                          |
|               | 10027600                 | Migraine aggravated                 |                          |
|               | 10027602                 | Migraine headache                   |                          |
|               | 10027606                 | Migraine type headaches             |                          |
|               | 10027607                 | Migraine with aura                  |                          |
|               | 10027611                 | Migrainous headache                 |                          |
|               | 10040744                 | Sinus headache                      |                          |
|               | 10043208                 | Temporal headache                   |                          |
|               | 10043269                 | Tension headache                    |                          |
|               | 10043270                 | Tension headache (excl migraine)    |                          |
|               | 10043271                 | Tension headaches                   |                          |
|               | 10048567                 | Headache aggravated                 |                          |
|               | 10048967                 | Frontal headache                    |                          |
|               | 10048968                 | Occipital headache                  |                          |
|               | 10052403                 | Frequent headaches                  |                          |
|               | 10053850                 | Chronic headaches                   |                          |
|               | 10056236                 | Complicated migraine                |                          |
|               | 10056791                 | Headache (excl migraine) aggravated |                          |
|               | 10058140                 | Throbbing headache                  |                          |
|               | 10059133                 | Cluster headache                    |                          |
|               | 10059296                 | Intermittent headache               |                          |
|               | 10066618                 | Headache recurrent                  |                          |
|               | 10066635                 | Acute migraine                      |                          |
|               | 10066965                 | Procedural headache                 |                          |
|               | 10068106                 | Occipital neuralgia                 |                          |
|               | 10076678                 | New daily persistent headache       |                          |
|               | 10078943                 | Persistent headache                 |                          |
|               | Fatigue                  | 10008874                            | Chronic fatigue syndrome |
|               |                          | 10011865                            | Daytime sleepiness       |
|               |                          | 10013649                            | Drowsiness               |
|               |                          | 10015667                            | Exhaustion               |
|               |                          | 10016252                            | Fatigability             |
| 10016253      | Fatigability generalized |                                     |                          |
| 10016256      | Fatigue                  |                                     |                          |

|                       |          |                                 |
|-----------------------|----------|---------------------------------|
|                       | 10016257 | Fatigue extreme                 |
|                       | 10016356 | Feeling of total lack of energy |
|                       | 10016373 | Feelings of weakness            |
|                       | 10016380 | Felt generally ill              |
|                       | 10018066 | General malaise                 |
|                       | 10018135 | Generally unwell                |
|                       | 10019349 | Heaviness in limbs              |
|                       | 10019353 | Heavy feeling in arms & legs    |
|                       | 10021345 | Ill feeling                     |
|                       | 10024262 | Lethargic                       |
|                       | 10024263 | Lethargic tendency              |
|                       | 10024264 | Lethargy                        |
|                       | 10041014 | Sleepiness                      |
|                       | 10043885 | Tired all the time              |
|                       | 10043889 | Tired out                       |
|                       | 10043890 | Tiredness                       |
|                       | 10047830 | Washed-out                      |
|                       | 10047862 | Weakness                        |
|                       | 10047865 | Weakness generalized            |
|                       | 10049565 | Muscle fatigue                  |
|                       | 10054853 | Mental exhaustion               |
|                       | 10059078 | Vaccination related malaise     |
|                       | 10066564 | Chronic fatigue                 |
|                       | 10076757 | Mental fatigue                  |
| Muscle and joint pain | 10000424 | Ache                            |
|                       | 10000431 | Aches & pains in legs           |
|                       | 10000449 | Aching joints                   |
|                       | 10006002 | Bone pain                       |
|                       | 10016795 | Flu-like aching                 |
|                       | 10018074 | Generalised aching              |
|                       | 10018086 | Generalised joint pains         |
|                       | 10018089 | Generalised muscle aches        |
|                       | 10023197 | Joint ache                      |
|                       | 10023222 | Joint pain                      |
|                       | 10028287 | Muscle ache                     |
|                       | 10028322 | Muscle pain                     |
|                       | 10028332 | Muscle soreness                 |
|                       | 10028362 | Muscular pains                  |
|                       | 10028411 | Myalgia                         |
|                       | 10033511 | Painful joints                  |
|                       | 10048439 | Fibromyalgia                    |
|                       | 10048971 | General body pain               |
|                       | 10062428 | Generalized aching              |
|                       | 10062438 | Generalized joint pain          |
|                       | 10062441 | Generalized muscle aches        |
| Fever                 | 10005911 | Body temperature increased      |
|                       | 10008531 | Chills                          |
|                       | 10009866 | Cold sweat                      |
|                       | 10013697 | Drug fever                      |
|                       | 10016334 | Feeling hot                     |
|                       | 10016335 | Feeling hot and cold            |
|                       | 10016558 | Fever                           |
|                       | 10016559 | Fever chills                    |
|                       | 10016563 | Fever of unknown origin         |
|                       | 10016791 | Flu like symptoms               |

|                            |          |                                    |
|----------------------------|----------|------------------------------------|
|                            | 10020083 | High temperature                   |
|                            | 10020741 | Hyperpyrexia                       |
|                            | 10022004 | Influenza like illness             |
|                            | 10022009 | Influenza-like symptoms            |
|                            | 10022571 | Intermittent pyrexia               |
|                            | 10037660 | Pyrexia                            |
|                            | 10039997 | Sensation of cold                  |
|                            | 10040528 | Shaking                            |
|                            | 10040529 | Shaking inside                     |
|                            | 10040531 | Shaky feelings                     |
|                            | 10040558 | Shivering                          |
|                            | 10040559 | Shivers                            |
|                            | 10041021 | Slight fever                       |
|                            | 10042661 | Sweating                           |
|                            | 10042662 | Sweating abnormal                  |
|                            | 10042663 | Sweating attack                    |
|                            | 10042666 | Sweating fever                     |
|                            | 10043204 | Temperature elevation              |
|                            | 10052545 | Flu symptoms                       |
|                            | 10058698 | Intermittent fever                 |
|                            | 10061458 | Feeling of body temperature change |
|                            | 10073718 | Feverish                           |
|                            | 10079564 | Injection associated shivering     |
|                            | 10082526 | Skin temperature                   |
| Nausea                     | 10016365 | Feeling sick                       |
|                            | 10027990 | Motion sickness                    |
|                            | 10028813 | Nausea                             |
|                            | 10028822 | Nauseated                          |
|                            | 10028823 | Nauseous                           |
|                            | 10034716 | Persistent vomiting                |
|                            | 10040658 | Sickness                           |
|                            | 10047699 | Vomited                            |
|                            | 10047700 | Vomiting                           |
| Localised vaccine reaction | 10000448 | Aching in limb                     |
|                            | 10000656 | Acute allergic reaction            |
|                            | 10001718 | Allergic reaction                  |
|                            | 10003875 | Axillary lymph nodes enlarged      |
|                            | 10021432 | Immunisation reaction              |
|                            | 10021951 | Inflammation at site of injection  |
|                            | 10022052 | Injection site bruising            |
|                            | 10022058 | Injection site edema               |
|                            | 10022061 | Injection site erythema            |
|                            | 10022078 | Injection site inflammation        |
|                            | 10022079 | Injection site irritation          |
|                            | 10022080 | Injection site itching             |
|                            | 10022086 | Injection site pain                |
|                            | 10022102 | Injection site tenderness          |
|                            | 10022110 | Injection site vascular warmth     |
|                            | 10022112 | Injection site warmth              |
|                            | 10023698 | Large arm swelling                 |
|                            | 10033421 | Pain in arm                        |
|                            | 10033503 | Painful arm                        |
|                            | 10040758 | Site of vaccination painful        |
|                            | 10042696 | Swelling of injection site         |
|                            | 10042716 | Swollen arm                        |

|                   |          |                                 |
|-------------------|----------|---------------------------------|
|                   | 10050114 | Application site bruise         |
|                   | 10059080 | Vaccination site reaction       |
|                   | 10068879 | Vaccination site pain           |
|                   | 10076504 | Injection site muscle pain      |
|                   | 10082049 | Armpit pain                     |
| Dizziness         | 10013573 | Dizziness                       |
|                   | 10013576 | Dizziness exertional            |
|                   | 10013577 | Dizziness on standing up        |
|                   | 10013578 | Dizziness postural              |
|                   | 10013579 | Dizziness upon standing         |
|                   | 10013580 | Dizzy                           |
|                   | 10013581 | Dizzy on standing               |
|                   | 10013582 | Dizzy spells                    |
|                   | 10016167 | Faint                           |
|                   | 10016169 | Fainting                        |
|                   | 10016379 | Felt faint                      |
|                   | 10024461 | Light headedness                |
|                   | 10024490 | Light-headed                    |
|                   | 10024491 | Light-headed feeling            |
|                   | 10047340 | Vertigo                         |
|                   | 10048324 | Dizziness aggravated            |
|                   | 10066202 | Near fainting                   |
| Menstrual changes | 10005120 | Bleeding intermenstrual         |
|                   | 10005123 | Bleeding menstrual heavy        |
|                   | 10011299 | Cramps menstrual                |
|                   | 10012204 | Delayed period                  |
|                   | 10017370 | Frequent periods                |
|                   | 10019360 | Heavy periods                   |
|                   | 10022559 | Intermenstrual bleeding         |
|                   | 10022991 | Irregular menstrual cycle       |
|                   | 10022993 | Irregular periods               |
|                   | 10024008 | Late period                     |
|                   | 10027324 | Menstrual cramps                |
|                   | 10027330 | Menstrual flooding              |
|                   | 10033514 | Painful periods                 |
|                   | 10034532 | Period pains                    |
|                   | 10036619 | Premenstrual tension            |
|                   | 10036867 | Prolonged heavy periods         |
|                   | 10040603 | Shortening of menstrual cycle   |
|                   | 10051537 | Premenstrual dysphoric disorder |
|                   | 10056344 | Menstrual discomfort            |

---
